# Supplementary material for: Uptake and Outcomes of Neoadjuvant Chemotherapy Among US Patients With Less Common Epithelial Ovarian Carcinomas
Source: PubMed Central journal article supplement (PMC10276312; doi:10.1001/jamanetworkopen.2023.18602), 2023-06-16
Supplement: jamanetwopen-e2318602-s001.pdf [file jamanetwopen-e2318602-s001.pdf]

## Supplementary Online Content

Matsuo K, Matsuzaki S, Maeda M, et al. Uptake and outcomes of neoadjuvant chemotherapy among US patients with less common epithelial ovarian carcinomas. *JAMA Netw Open*. 2023;6(6):e2318602. doi:10.1001/jamanetworkopen.2023.18602

**eMethods 1.** Systematic Literature Review and Meta-analysis

**eReferences 1**

**eMethods 2.** Search Key Words

**eTable 1.** Proportion of Rare Epithelial Carcinomas in Prior Randomized Trials

**eReferences 2**

**eTable 2.** Baseline Demographics per Histology Types (NCDB Cohort)

**eTable 3.** Temporal Trends of NACT per Age and Stage (NCDB Cohort)

**eTable 4.** Multivariable Analysis for NACT Utilization (NCDB Cohort)

**eTable 5.** Residual Disease at Surgery

**eTable 6.** Meta-data of Eligible Studies

**eReferences 3**

**eFigure 1.** Study Selection Schema (NCDB Cohort)

**eFigure 2.** Balance Statistics for IPTW (NCDB Cohort)

**eFigure 3.** Study Selection Schema (SEER Cohort)

**eFigure 4.** Overall Survival (SEER Cohort)

**eFigure 5.** Study Selection Scheme of the Systematic Literature Search

**eFigure 6.** Meta-analysis (Exploratory)

**eFigure 7.** Meta-analysis for Stage III Disease (Exploratory)

**eFigure 8.** Meta-analysis for Stage IV Disease (Exploratory)

This supplementary material has been provided by the authors to give readers additional information about their work.

## **eMethods 1. Systematic literature review and meta-analysis.**

A systematic review (PROSPERO registration ID: CRD42022359329) and meta-analysis was conducted to determine the effect of neoadjuvant chemotherapy (NACT) on overall survival [OS] and disease-free survival [DFS] among patients with low-grade ovarian serous carcinoma (LGSOC), ovarian clear cell carcinoma (OCCC), and mucinous ovarian cancer (MOC). The meta-analysis investigated survival outcomes by comparing the patients treated with primary debulking surgery and NACT.

### *Article retrieval*

We conducted a systematic search of articles published through July 31, 2022, using PubMed, Scopus, and Cochrane Library as performed in our previous study.<sup>1-3</sup> We reviewed articles according to the Preferred Reporting Items for Systematic Reviews and Meta-Analyses guidelines.<sup>4</sup> Studies were identified by screening the titles, abstracts, and full texts of relevant articles, as previously described.<sup>1-3</sup> All titles and abstracts were screened by Shinya Matsuzaki and Michihide Maeda.

Initially, various patterns of keywords listed in Supplementary Methods S2 were used to identify studies on ovarian cancer. Thereafter, the selected articles were screened to identify studies that examined the effect of NACT for patients with LGSOC, OCCC, and MOC, using the following keywords: Neoadjuvant therapy [MeSH] (except for Scopus) OR Neoadjuvant OR “followed by interval debulking” OR “followed by cytoreduc\*” OR “primary chemotherapy”

### *Inclusion criteria*

Studies were included if they met the following inclusion criteria: (i) patients with LGSOC, OCCC, and MOC (treated with NACT); (ii) sufficient information about NACT and relevant outcomes; (iii) specific relevant outcomes in patients with LGSOC, OCCC, and MOC were clarified; (iv) original articles involving studies, such as retrospective or prospective cohort studies, population-based studies, case-control studies, and randomized controlled trials.

### *Exclusion criteria*

The studies with following criteria were excluded: (i) insufficient information regarding NACT; (ii) insufficient survival or recurrence information; (iii) not in the field of interest; (iv) articles involving case reports, case series, and systematic reviews; (v) conference abstracts; and (vi) articles not in English.

### *Data extraction*

Data were extracted and the following variables were recorded by Shinya Matsuzaki and Michihide Maeda: first author's name, year of study, histology type, number of included cases, number of patients with primary debulking surgery, number of patients with NACT, and outcomes of interest (OS and DFS).

### *Meta-analysis plan*

After the eligible studies were identified in the systematic literature review, the results of main study cohort (National Cancer Database) in the current study was added in the meta-analysis. Then, the results of second cohort (Surveillance, Epidemiology, and End Results Program) were further added as an exploratory fashion. This approach was undertaken because both databases were derived in the U.S. centers that certain cases may be possibly captured in the two mechanisms. Then, among the studies including the current two cohorts, stage-specific analysis (stage III and IV) was undertaken.

Survival outcome estimates for primary debulking surgery vs NACT were computed using the 95% confidence intervals of the reported values to estimate the hazard ratios for OS and DFS. Heterogeneity among the eligible studies was determined using  $I^2$ , which measures the percentage of total variation across studies. The meta-analysis and the production of all graphics were performed using RevMan 5.4.1 software (Cochrane Collaboration, Copenhagen, Denmark). For consistency, data from all outcomes (continuous and bivariate) were entered into RevMan 5.4.1 in such a way that negative effect sizes or relative risks <1 favored active intervention.

## eReferences 1

1. Matsuzaki S, Matsuzaki S, Chang EJ, Yasukawa M, Roman LD, Matsuo K. Surgical and oncologic outcomes of hyperthermic intraperitoneal chemotherapy for uterine leiomyosarcoma: A systematic review of literature. *Gynecologic oncology* 2021;161:70-77.
2. Matsuzaki S, Klar M, Matsuzaki S, Roman LD, Sood AK, Matsuo K. Uterine carcinosarcoma: Contemporary clinical summary, molecular updates, and future research opportunity. *Gynecologic oncology* 2021;160:586-601.
3. Matsuo K, Novatt H, Matsuzaki S, et al. Wait-time for hysterectomy and survival of women with early-stage cervical cancer: A clinical implication during the coronavirus pandemic. *Gynecologic oncology* 2020;158:37-43.
4. Page MJ, McKenzie JE, Bossuyt PM, et al. Updating guidance for reporting systematic reviews: development of the PRISMA 2020 statement. *Journal of clinical epidemiology* 2021;134:103-12.

## eMethods 2. Search keywords.

Three public searching engines used for analysis: PubMed, Scopus, and Cochrane.

### 1. PubMed

#1 Ovarian Neoplasms [MeSH]

#2 Pelvic Neoplasms [MeSH]

#3 Fallopian Tube Neoplasms [MeSH]

#4 Adnexal Diseases [MeSH]

#5 ovary [tiab] OR ovaries [tiab] OR ovarian [tiab] OR adnexa [tiab] OR fallopian [tiab] OR peritoneal [tiab]

#6 neoplasm [tiab] OR cancer [tiab] OR cancers [tiab] OR carcinoma [tiab] OR carcinomas [tiab] OR malignan\* [tiab] OR tumor\* [tiab] OR tumour\* [tiab]

#7 #5 AND #6

#8 #1 OR #2 OR #3 OR #4 OR #7

#9 Neoadjuvant therapy [MeSH]

#10 Neoadjuvant [tiab] OR “followed by interval debulking” [tiab] OR “followed by cytoreduc\*” [tiab] OR “primary chemotherapy” [tiab]

#11 #9 OR #10

#12 #8 AND #11

#13 “clear cell” [tiab] OR mucinous [tiab] OR low-grade [tiab] OR “rare type” [tiab] OR “chemo resistant” [tiab] OR “chemoresistance” [tiab]

#14 #12 AND #13

### 2. Scopus

#1 TITLE-ABS-KEY (ovarian OR ovary OR ovaries OR adnexa OR peritoneal OR fallopian) W/2 (neoplasm OR cancer OR malignan\* OR tumor OR tumour OR carcinoma)

#2 TITLE-ABS-KEY (Neoadjuvant OR “followed by cytoreductive surgery” OR “followed by interval debulking” OR “primary chemotherapy” OR “before surgery”)

#3 #1 AND #2

#4 TITLE-ABS-KEY (clear cell OR mucinous OR low-grade OR “rare type” OR “chemo resistant” OR “chemoresistance”)

#5 #3 AND #4

### 3. Cochrane

#1 MeSH descriptor: [Ovarian Neoplasms]

#2 MeSH descriptor: [Adnexal Diseases]

#3 MeSH descriptor: [Fallopian Tube Neoplasms]

#4 MeSH descriptor: [Pelvic Neoplasms]

#5 (ovar\* or adnexal or fallopian or peritoneal or pelvic) near/3 (cancer\* or carcinoma\* or malignan\* or mass or masses or cyst or cysts or neoplasm\* or tumor\* or tumour\*)

#6 (epithelial) near/5 (ovar\*)

#7 #5 AND #6

#8 #1 OR #2 OR #3 OR #4 OR #7

#9 MeSH descriptor: [Neoadjuvant Therapy]

#10 #8 AND #9

**eTable 1. Proportion of rare epithelial carcinomas in prior randomized trials.**

| Trial            | EORTC-55971 <sup>1</sup> |               | CHORUS <sup>2</sup> |               | SCORPION <sup>3</sup> |              | JCOG-0602 <sup>4</sup> |               |
|------------------|--------------------------|---------------|---------------------|---------------|-----------------------|--------------|------------------------|---------------|
| Year             | 2010                     |               | 2015                |               | 2020                  |              | 2020                   |               |
| Exposure         | PDS                      | NACT          | PDS                 | NACT          | PDS                   | NACT         | PDS                    | NACT          |
| No. patients (%) | <i>n</i> =336            | <i>n</i> =334 | <i>n</i> =255       | <i>n</i> =219 | <i>n</i> =84          | <i>n</i> =87 | <i>n</i> =147          | <i>n</i> =130 |
| Clear cell       | 6 (1.8)                  | 4 (1.2)       | 4 (1.6)             | 13 (5.9)      | 1 (1.2)               | 0            | 12 (8.2)               | 4 (3.1)       |
| Mucinous         | 8 (2.4)                  | 11 (3.3)      | 2 (0.8)             | 4 (1.8)       | 0                     | 0            | 2 (1.4)                | 2 (1.5)       |
| Low-grade serous | n/a                      | n/a           | 10 (3.9)            | 9 (4.1)       | 1 (1.2)               | 0            | n/a                    | n/a           |

Proportions of rare epithelial ovarian cancer (clear cell, mucinous, and low-grade serous) are shown per treatment type in each trial. *n/a*, not applicable; *PDS*, primary debulking surgery; and *NACT*, neoadjuvant chemotherapy.

## eReferences 2

1. Vergote I, Tropé CG, Amant F, et al. Neoadjuvant chemotherapy or primary surgery in stage IIIC or IV ovarian cancer. *The New England journal of medicine* 2010;363:943-53.
2. Kehoe S, Hook J, Nankivell M, et al. Primary chemotherapy versus primary surgery for newly diagnosed advanced ovarian cancer (CHORUS): an open-label, randomised, controlled, non-inferiority trial. *Lancet*. 2015;386(9990):249-257.
3. Fagotti A, Ferrandina MG, Vizzielli G, et al. Randomized trial of primary debulking surgery versus neoadjuvant chemotherapy for advanced epithelial ovarian cancer (SCORPION-NCT01461850). *Int J Gynecol Cancer*. 2020;30(11):1657-1664.
4. Onda T, Satoh T, Ogawa G, et al. Comparison of survival between primary debulking surgery and neoadjuvant chemotherapy for stage III/IV ovarian, tubal and peritoneal cancers in phase III randomised trial. *European journal of cancer (Oxford, England : 1990)* 2020;130:114-25.

**eTable 2. Baseline demographics per histology types (NCDB cohort).**

| Characteristic           | Clear cell      |               |         | Low-grade serous |               |         | Mucinous      |              |         |
|--------------------------|-----------------|---------------|---------|------------------|---------------|---------|---------------|--------------|---------|
|                          | PDS             | NACT          | P-value | PDS              | NACT          | P-value | PDS           | NACT         | P-value |
| No. patients             | <i>n</i> =1,576 | <i>n</i> =253 |         | <i>n</i> =1,036  | <i>n</i> =120 |         | <i>n</i> =800 | <i>n</i> =95 |         |
| Age                      | 56 (49-63)      | 59 (52-67)    | <.001   | 52 (41-63)       | 61 (50-71)    | <.001   | 56 (47-65)    | 61 (53-72)   | <.001   |
| Year                     |                 |               | <.001   |                  |               | .007    |               |              | .07     |
| 1 <sup>st</sup> quartile | 22.3            | 15.8          |         | 26.4             | 19.2          |         | 30.6          | 24.2         |         |
| 2 <sup>nd</sup> quartile | 26.0            | 19.4          |         | 24.6             | 20.0          |         | 23.0          | 21.1         |         |
| 3 <sup>rd</sup> quartile | 23.9            | 31.2          |         | 26.2             | 28.3          |         | 24.6          | 25.3         |         |
| 4 <sup>th</sup> quartile | 27.9            | 33.6          |         | 22.8             | 32.5          |         | 21.8          | 29.5         |         |
| Race/ethnicity           |                 |               | .59     |                  |               | .61     |               |              | .61     |
| Non-Hispanic White       | 79.9            | 77.1          |         | 84.0             | 86.7          |         | 74.5          | 77.9         |         |
| Other*                   | 19.7            | 22.5          |         | 15.5             | 15.0          |         | 24.9          | 22.1         |         |
| Unknown                  | **              | **            |         | **               | **            |         | **            | 0            |         |
| Comorbidity index        |                 |               | .02     |                  |               | .06     |               |              | .83     |
| 0                        | 85.1            | 81.8          |         | 82.6             | 75.0          |         | 81.5          | 78.9         |         |
| 1                        | 12.8            | 13.0          |         | 14.7             | 19.2          |         | 13.8          | 15.8         |         |
| ≥2                       | 2.1             | 5.1           |         | 2.7              | **            |         | 4.8           | **           |         |
| Insurance                |                 |               | <.001   |                  |               | <.001   |               |              | .07     |
| Private                  | 68.0            | 53.8          |         | 61.2             | 34.2          |         | 48.5          | 51.6         |         |
| Medicaid                 | 6.3             | 11.1          |         | 9.7              | 14.2          |         | 13.3          | **           |         |
| Medicare                 | 18.5            | 29.6          |         | 20.8             | 40.0          |         | 27.9          | 35.8         |         |
| Other                    | 5.8             | 4.3           |         | 6.2              | **            |         | 9.0           | **           |         |
| Unknown                  | 1.4             | **            |         | 2.0              | **            |         | 1.4           | 0            |         |
| Median household income  |                 |               | .08     |                  |               | .03     |               |              | .15     |
| QT1 (lowest)             | 8.8             | 10.3          |         | 10.4             | 10.8          |         | 13.9          | **           |         |
| QT2                      | 12.2            | 18.2          |         | 14.2             | 21.7          |         | 17.4          | 22.1         |         |
| QT3                      | 24.7            | 20.9          |         | 26.4             | 33.3          |         | 26.8          | 26.3         |         |
| QT4 (highest)            | 45.4            | 42.3          |         | 37.1             | 25.8          |         | 35.1          | 29.5         |         |
| Unknown                  | 8.8             | 8.3           |         | 12.0             | **            |         | 6.9           | 12.6         |         |
| No high school degree    |                 |               | .08     |                  |               | .03     |               |              | .15     |
| ≥29%                     | 8.8             | 10.3          |         | 10.4             | 10.8          |         | 13.9          | **           |         |
| 20.0-28.9%               | 12.2            | 18.2          |         | 14.2             | 21.7          |         | 17.4          | 22.1         |         |
| 14.0-19.9%               | 24.7            | 20.9          |         | 26.4             | 33.3          |         | 26.8          | 26.3         |         |
| <14.0%                   | 45.4            | 42.3          |         | 37.1             | 25.8          |         | 35.1          | 29.5         |         |
| Unknown                  | 8.8             | 8.3           |         | 12.0             | **            |         | 6.9           | 12.6         |         |

|                         |      |      |       |      |      |       |      |      |       |
|-------------------------|------|------|-------|------|------|-------|------|------|-------|
| Cancer stage            |      |      | <.001 |      |      | <.001 |      |      | <.001 |
| IIIA                    | 9.9  | 7.5  |       | 9.9  | **   |       | 9.6  | 0    |       |
| IIIB                    | 8.3  | 5.1  |       | 10.4 | **   |       | 10.5 | **   |       |
| IIIC                    | 60.2 | 39.9 |       | 63.2 | 51.4 |       | 51.1 | 37.9 |       |
| III NOS                 | 2.9  | **   |       | 3.6  | **   |       | 3.6  | **   |       |
| IV                      | 18.7 | 45.5 |       | 12.8 | 36.7 |       | 25.1 | 49.5 |       |
| CA125                   |      |      | <.001 |      |      | .07   |      |      | .10   |
| Negative/normal         | 7.6  | **   |       | 8.6  | **   |       | 9.1  | **   |       |
| Positive/elevated       | 74.7 | 87.4 |       | 71.6 | 75.8 |       | 67.8 | 77.9 |       |
| Unknown                 | 17.8 | 11.5 |       | 19.8 | 21.7 |       | 23.1 | 17.9 |       |
| Facility type           |      |      | 0.02  |      |      | .10   |      |      | .01   |
| Community center        | 3.8  | 4.7  |       | 3.0  | **   |       | 6.0  | **   |       |
| Comprehensive community | 34.6 | 26.9 |       | 26.0 | 30.0 |       | 36.5 | 44.2 |       |
| Academic/research       | 43.5 | 51.8 |       | 36.8 | 44.2 |       | 33.3 | 42.1 |       |
| Integrated network      | 12.3 | 13.8 |       | 12.4 | 11.7 |       | 11.4 | **   |       |
| Unknown                 | 5.8  | **   |       | 21.9 | 13.3 |       | 12.9 | **   |       |
| Facility location       |      |      | 0.78  |      |      | .01   |      |      | .21   |
| East                    | 41.4 | 41.1 |       | 42.0 | 32.7 |       | 39.5 | 31.5 |       |
| Central North           | 28.5 | 29.7 |       | 27.6 | 21.2 |       | 26.3 | 25.0 |       |
| Central South           | 11.9 | 9.8  |       | 17.4 | 28.8 |       | 18.4 | 19.6 |       |
| West                    | 18.3 | 19.5 |       | 13.0 | 17.3 |       | 15.9 | 23.9 |       |

Median (IQR) or percentage per group is shown. \* Asian including Pacific Islanders, Hispanic, Native American, non-Hispanic Black, and other determined by the program. \*\* Small number suppressed (1-10). *PDS*, primary debulking; *NACT*, neoadjuvant chemotherapy.



**eTable 3. Temporal trends of NACT per age and stage (NCDB cohort).**

| Characteristic              | T1   | T2   | T3   | T4   | $\Delta$ (%)* | P-value |
|-----------------------------|------|------|------|------|---------------|---------|
| <b>Age stratification</b>   |      |      |      |      |               |         |
| Clear cell                  |      |      |      |      |               |         |
| ≤56 y                       | 5.2  | 8.6  | 16.2 | 13.0 | 154.9         | .001    |
| >56 y                       | 15.2 | 13.0 | 18.6 | 19.3 | 27.0          | .10     |
| Low-grade serous            |      |      |      |      |               |         |
| ≤53 y                       | 6.0  | 5.9  | 7.0  | 6.3  | 5.0           | .80     |
| >53 y                       | 9.6  | 11.8 | 14.7 | 22.6 | 135.4         | .002    |
| Mucinous                    |      |      |      |      |               |         |
| ≤57 y                       | 7.5  | 8.7  | 6.8  | 8.6  | 14.7          | .91     |
| >57 y                       | 9.6  | 10.9 | 15.5 | 19.6 | 104.2         | .02     |
| <b>Comorbidity index</b>    |      |      |      |      |               |         |
| Clear cell                  |      |      |      |      |               |         |
| 0                           | 9.4  | 10.2 | 16.9 | 16.0 | 70.2          | <.001   |
| ≥1                          | 14.8 | 13.5 | 20.0 | 17.4 | 17.6          | .48     |
| Low-grade serous            |      |      |      |      |               |         |
| 0                           | 6.5  | 6.3  | 11.9 | 13.2 | 103.1         | .003    |
| ≥1                          | 13.5 | 17.2 | 7.7  | 18.8 | 39.3          | .82     |
| Mucinous                    |      |      |      |      |               |         |
| 0                           | 7.4  | 10.0 | 11.3 | 13.4 | 81.1          | .05     |
| ≥1                          | 13.5 | 8.8  | 9.0  | 15.8 | 17.0          | .85     |
| <b>Stage stratification</b> |      |      |      |      |               |         |
| Clear cell                  |      |      |      |      |               |         |
| Stage III                   | 7.3  | 7.3  | 12.1 | 11.7 | 60.3          | .01     |
| Stage IV                    | 22.7 | 22.5 | 37.6 | 28.8 | 26.9          | .15     |
| Low-grade serous            |      |      |      |      |               |         |
| Stage III                   | 4.4  | 7.7  | 8.0  | 11.3 | 156.8         | .008    |
| Stage IV                    | 25.0 | 15.2 | 30.2 | 26.4 | 5.6           | .58     |
| Mucinous                    |      |      |      |      |               |         |
| Stage III                   | 7.0  | 6.3  | 8.4  | 7.8  | 11.4          | .63     |
| Stage IV                    | 12.0 | 17.7 | 18.5 | 32.7 | 172.5         | .006    |

NACT utilization is shown in percentage per time period (3-year increments: 2006-2008 for T1, 2009-2011 for T2, 2012-2014 for T3, and 2015-2017 for T4). Age cutpoint was based on the median of each histology type. \* Relative increase is the interval percentage change from T1 to T4. The Cochrane-Armitage trend test was used for P-values.

**eTable 4. Multivariable analysis for NACT utilization (NCDB cohort).**

| Characteristic     | Clear cell       |         | Low-grade serous |         | Mucinous         |         |
|--------------------|------------------|---------|------------------|---------|------------------|---------|
|                    | aOR (95%CI)      | P-value | aOR (95%CI)      | P-value | aOR (95%CI)      | P-value |
| Age                | 1.03 (1.02-1.04) | <.001   | 1.03 (1.02-1.05) | <.001   | 1.03 (1.01-1.05) | <.001   |
| Year (quartile)    | 1.21 (1.06-1.37) | .003    | 1.26 (1.06-1.50) | .01     |                  |         |
| Cancer stage       |                  |         |                  |         |                  |         |
| III                | 1.00 (reference) |         | 1.00 (reference) |         | 1.00 (reference) |         |
| IV                 | 3.51 (2.64-4.66) | <.001   | 3.92 (2.57-5.99) | <.001   | 2.98 (1.92-4.61) | <.001   |
| CA125              |                  | <.001*  |                  |         |                  |         |
| Negative/normal    | 0.15 (0.05-0.46) | .001    |                  |         |                  |         |
| Positive/elevated† | 1.00 (reference) |         |                  |         |                  |         |
| Unknown            | 0.56 (0.37-0.85) | .006    |                  |         |                  |         |

A binary logistic regression model with conditional backward method (initial selection at  $P < .05$  and stopping rule of  $P < .05$ ) was fitted in each histology type, and only the covariates retained in the final model are displayed. \*Overall  $P$ -value. †including borderline. NACT, neoadjuvant chemotherapy; aOR, adjusted odds ratio; CI, confidence interval.

**eTable 5. Residual disease at surgery.**

| Outcome     | Clear cell |      |                 | Low-grade serous |      |                 | Mucinous |      |                 |
|-------------|------------|------|-----------------|------------------|------|-----------------|----------|------|-----------------|
|             | PDS        | NACT | <i>P</i> -value | PDS              | NACT | <i>P</i> -value | PDS      | NACT | <i>P</i> -value |
| NCDB cohort |            |      | <.001           |                  |      | <.001           |          |      | <.001           |
| Optimal     | 75.3       | 66.7 |                 | 75.5             | 56.7 |                 | 67.3     | 52.3 |                 |
| Suboptimal  | 11.5       | 24.1 |                 | 10.0             | 31.1 |                 | 14.2     | 32.3 |                 |
| Unknown     | 13.2       | 9.2  |                 | 14.5             | 12.2 |                 | 18.5     | 15.4 |                 |
| SEER cohort |            |      | .04             |                  |      | .09             |          |      | .82             |
| Optimal     | 72.6       | 70.8 |                 | 78.8             | 76.3 |                 | 71.3     | 71.0 | .               |
| Suboptimal  | 10.8       | 18.9 |                 | 8.6              | 18.4 |                 | 15.9     | 19.4 |                 |
| Unknown     | 16.6       | 10.4 |                 | 12.7             | 5.3  |                 | 12.8     | 9.7  |                 |

Percentage per exposure is shown. Examined the cases of 2010 or later due to the availability of information (Collaborative Stage Site-Specific Factor 3). Optimal included residual tumor nodule(s)  $\leq 1$ cm, optimal debulking (size not given), and no gross residual disease. Suboptimal included residual tumor nodule(s)  $> 1$ cm and macroscopic residual tumor (size not given). *PDS*, primary debulking surgery; *NACT*, neoadjuvant chemotherapy.

**eTable 6. Meta-data of eligible studies.**

| Author                     | Year | Total | PDS | NACT | HGSOC | OCCC | MOC | LGSOC | Comparison                         | DFS (HR: 95%CI)  | OS (HR: 95%CI)                |
|----------------------------|------|-------|-----|------|-------|------|-----|-------|------------------------------------|------------------|-------------------------------|
| Matsuo (NCDB) <sup>§</sup> | 2023 | 1101  | 932 | 169  | 0     | 1101 | 0   | 0     | NACT vs PDS (OCCC)                 | --               | 1.12 (0.95-1.33)              |
|                            |      | 497   | 442 | 55   | 0     | 0    | 497 | 0     | NACT vs PDS (MOC)                  | --               | 0.90 (0.68-1.19)              |
|                            |      | 655   | 584 | 71   | 0     | 0    | 0   | 655   | NACT vs PDS (LGSOC)                | --               | 2.12 (1.55-2.90)              |
| Matsuo (SEER) <sup>§</sup> | 2023 | 558   | 452 | 106  | 0     | 558  | 0   | 0     | NACT vs PDS (OCCC)                 | --               | 0.93 (0.74-1.16)              |
|                            |      | 226   | 195 | 31   | 0     | 0    | 226 | 0     | NACT vs PDS (MOC)                  | --               | 1.13 (0.72-1.78)              |
|                            |      | 283   | 245 | 38   | 0     | 0    | 0   | 283   | NACT vs PDS (LGSOC)                | --               | 3.17 (1.57-6.40)              |
| Bonsang <sup>1</sup>       | 2022 | 105   | 62  | 43   | 0     | 105  | 0   | 0     | NACT vs PDS (LGSOC)                | 1.66 (1.03-2.69) | 2.64 (1.37-5.06)              |
| Cobb <sup>2</sup>          | 2020 | 72    | 0   | 72   | 36    | 36   | 0   | 0     | HGSOC vs LGSOC (NACT)              | #                | ††                            |
| Onda <sup>3</sup>          | 2020 | 20    | 14  | 6    | --    | --   | 16  | 4     | NACT vs PDS (OCCC+MOC)             | --               | 1.95 (0.72-5.34)              |
| Scott <sup>4</sup>         | 2020 | 134   | 98  | 36   | 0     | 0    | 0   | 0     | NACT vs PDS (LGSOC)                | --               | 1.7 (0.9-3.2)                 |
| Chung <sup>5</sup>         | 2019 | 136   | 0   | 136  | --    | 30   | 28  | 0     | Others <sup>†</sup> vs OCCC (NACT) | 2.10 (1.30-3.42) | 2.62 (1.37-4.99)              |
|                            |      | 128   | 0   | 128  | --    | 30   | 0   | 20    | Others <sup>†</sup> vs MOC (NACT)  | 2.64 (1.54-4.50) | 4.69 (2.48-8.85)              |
| Kang <sup>6</sup>          | 2011 | 314   | 220 | 94   | 256   | --   | ¶   | ¶     | HGSOC vs OCCC+MOC (NACT)           | 1.08 (0.77-1.53) | --                            |
| Vergote <sup>7</sup>       | 2010 | 10    | 6   | 4    | --    | --   | 10  | 0     | NACT vs PDS (OCCC)                 | --               | 1.52(0.48-4.81) <sup>‡</sup>  |
|                            |      | 19    | 8   | 11   | --    | --   | 0   | 19    | NACT vs PDS (MOC)                  | --               | 1.32 (0.49-3.53) <sup>‡</sup> |
| Schmeler <sup>8</sup>      | 2008 | 25    | 0   | 25   | 0     | 25   | 0   | 0     | LGSOC (no comparison)              | *                | **                            |

Some values were inferred by the authors; thus, certain numbers in the table may be slightly different from the original values. <sup>§</sup>: present study; #: 16.4 months vs 18.5 months ( $P=0.69$ ); ††: 47.4 months vs 48.2 months ( $P=0.85$ ); ¶: the combined number of patients with OCCC and MOC was 58; \*: 21.4 months; \*\*: 56.1 months; †: LGSOC, endometrioid carcinoma, undifferentiated and carcinosarcoma, etc. ( $n=106$ ); ‡: estimated by the authors with reference to the image in Supplementary Figure S7. *NCDB*, National Cancer Database; *SEER*, Surveillance Epidemiology and End Results; *Total*, total number of eligible patients that met the relevant outcomes of interest; *PDS*, number of patients with primary debulking surgery; *NACT*, number of patients with neoadjuvant chemotherapy; *HGSOC*, high-grade serous ovarian carcinoma; *LGSOC*, low-grade ovarian serous carcinoma; *OCCC*, ovarian clear cell carcinoma; *MOC*, mucinous ovarian cancer; *DFS*, disease-free survival; *OS*, overall survival; *HR*, hazard ratio; *CI*, confidence interval; --, not applicable.

### eReferences 3

1. Bonsang-Kitzis H, Panchbhaya N, Bats AS, et al. Surgical Implications of Advanced Low-Grade Serous Ovarian Cancer: Analysis of the Database of the Tumeurs Malignes Rares Gynécologiques Network. *Cancers* 2022;14.
2. Cobb LP, Sun CC, Iyer R, et al. The role of neoadjuvant chemotherapy in the management of low-grade serous carcinoma of the ovary and peritoneum: Further evidence of relative chemoresistance. *Gynecologic oncology* 2020;158:653-58.
3. Onda T, Satoh T, Ogawa G, et al. Comparison of survival between primary debulking surgery and neoadjuvant chemotherapy for stage III/IV ovarian, tubal and peritoneal cancers in phase III randomised trial. *European journal of cancer (Oxford, England : 1990)* 2020;130:114-25.
4. Scott SA, Llaurodo Fernandez M, Kim H, et al. Low-grade serous carcinoma (LGSC): A Canadian multicenter review of practice patterns and patient outcomes. *Gynecologic oncology* 2020;157:36-45.
5. Chung YS, Park SY, Lee JY, et al. Outcomes of non-high grade serous carcinoma after neoadjuvant chemotherapy for advanced-stage ovarian cancer: a Korean gynecologic oncology group study (OV 1708). *BMC cancer* 2019;19:341.
6. Kang S, Kim TJ, Seo SS, Kim BG, Bae DS, Park SY. Interaction between preoperative CA-125 level and survival benefit of neoadjuvant chemotherapy in advanced epithelial ovarian cancer. *Gynecologic oncology* 2011;120:18-22.
7. Vergote I, Tropé CG, Amant F, et al. Neoadjuvant chemotherapy or primary surgery in stage IIIC or IV ovarian cancer. *The New England journal of medicine* 2010;363:943-53.
8. Schmeler KM, Sun CC, Bodurka DC, et al. Neoadjuvant chemotherapy for low-grade serous carcinoma of the ovary or peritoneum. *Gynecologic oncology* 2008;108:510-4.

**eFigure 1. Study selection schema (NCDB cohort).**

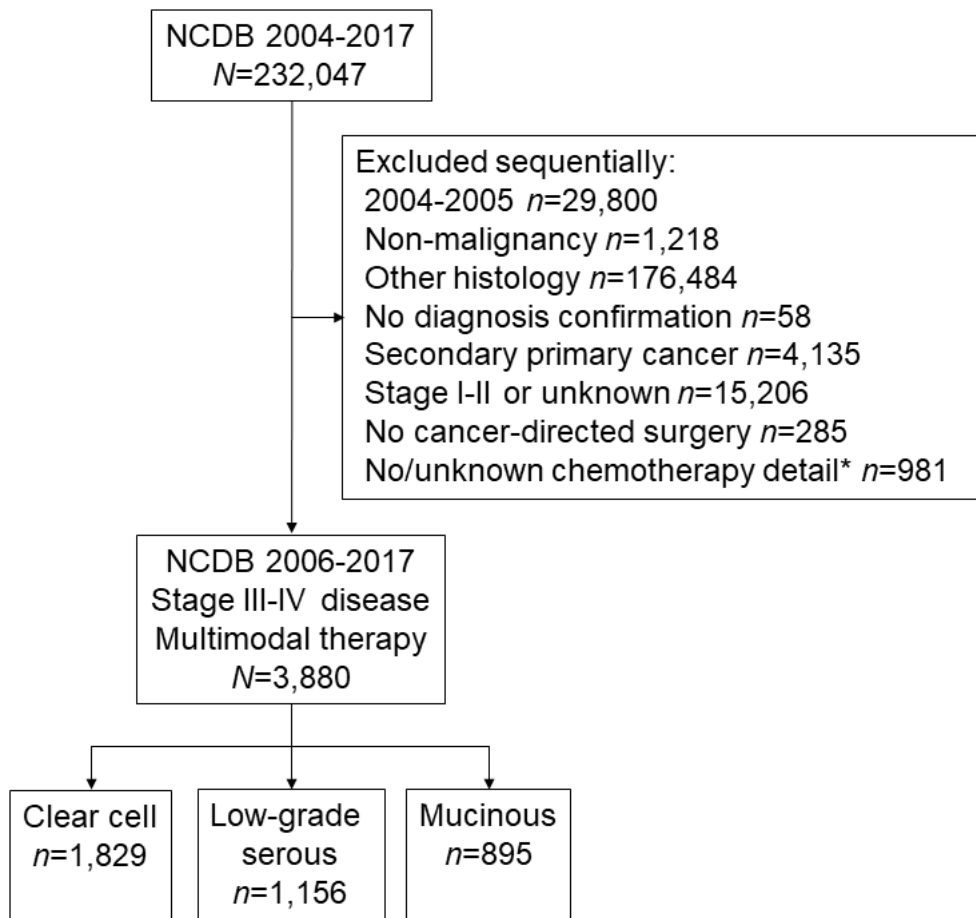

Multimodal therapy refers to cancer-directed surgery and systemic chemotherapy. \* including unknown sequence of chemotherapy and cancer-directed surgery and intraperitoneal chemotherapy cases. *NCDB*, National Cancer Database.

**eFigure 2. Balance statistics for IPTW (NCDB cohort).**

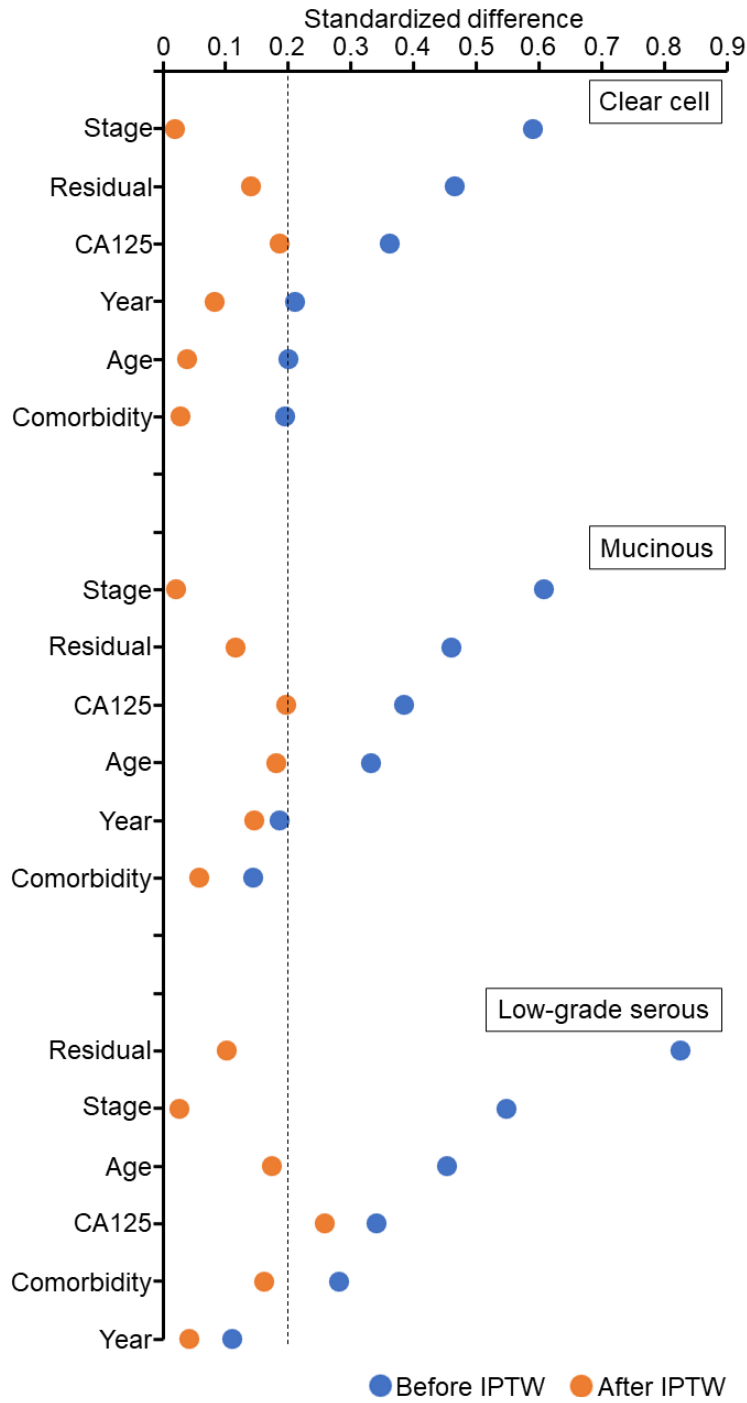

Vertical dashed line indicates the value of 0.20. Abbreviation: IPTW, inverse probability of treatment weighting.

**eFigure 3. Study selection schema (SEER cohort).**

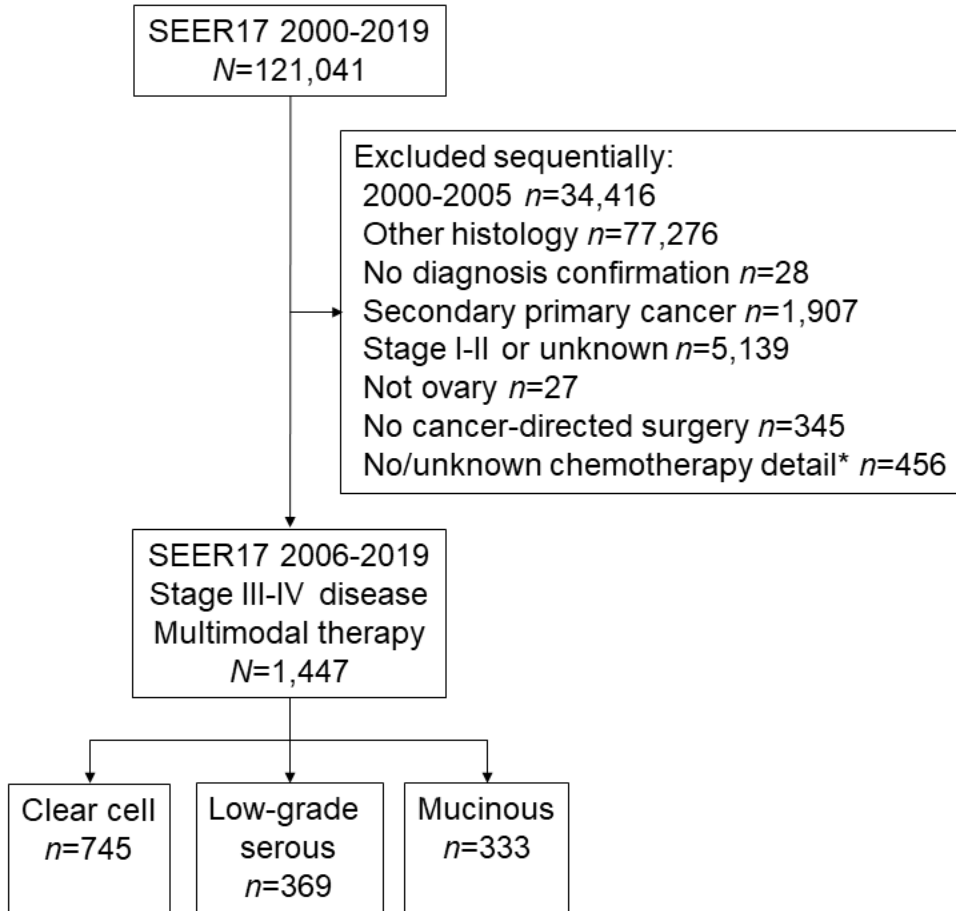

Multimodal therapy refers to cancer-directed surgery and systemic chemotherapy. \* including unknown sequence of chemotherapy and cancer-directed surgery and intraperitoneal chemotherapy cases.



**eFigure 4. Overall survival (SEER cohort).**

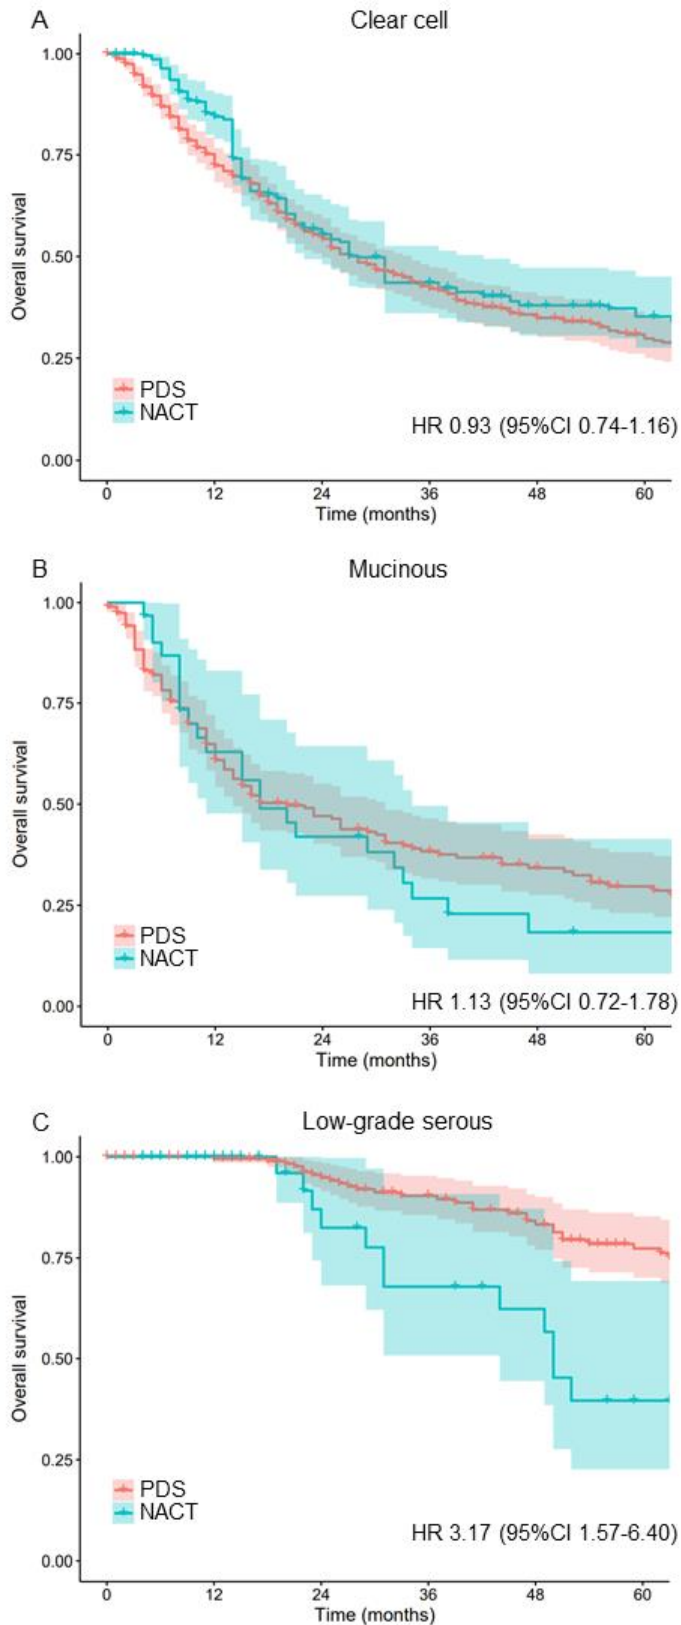

Overall survival based on exposure (NACT vs PDS) are shown for (A) clear cell, (B) mucinous, and (C) low-grade serous carcinomas. The X-axis is truncated at 60 months. Color band widths indicate 95%CI. Abbreviations: HR, hazard ratio; CI, confidence interval; NACT, neoadjuvant chemotherapy; and PDS, primary debulking surgery.

**eFigure 5. Study selection scheme of the systematic literature search.**

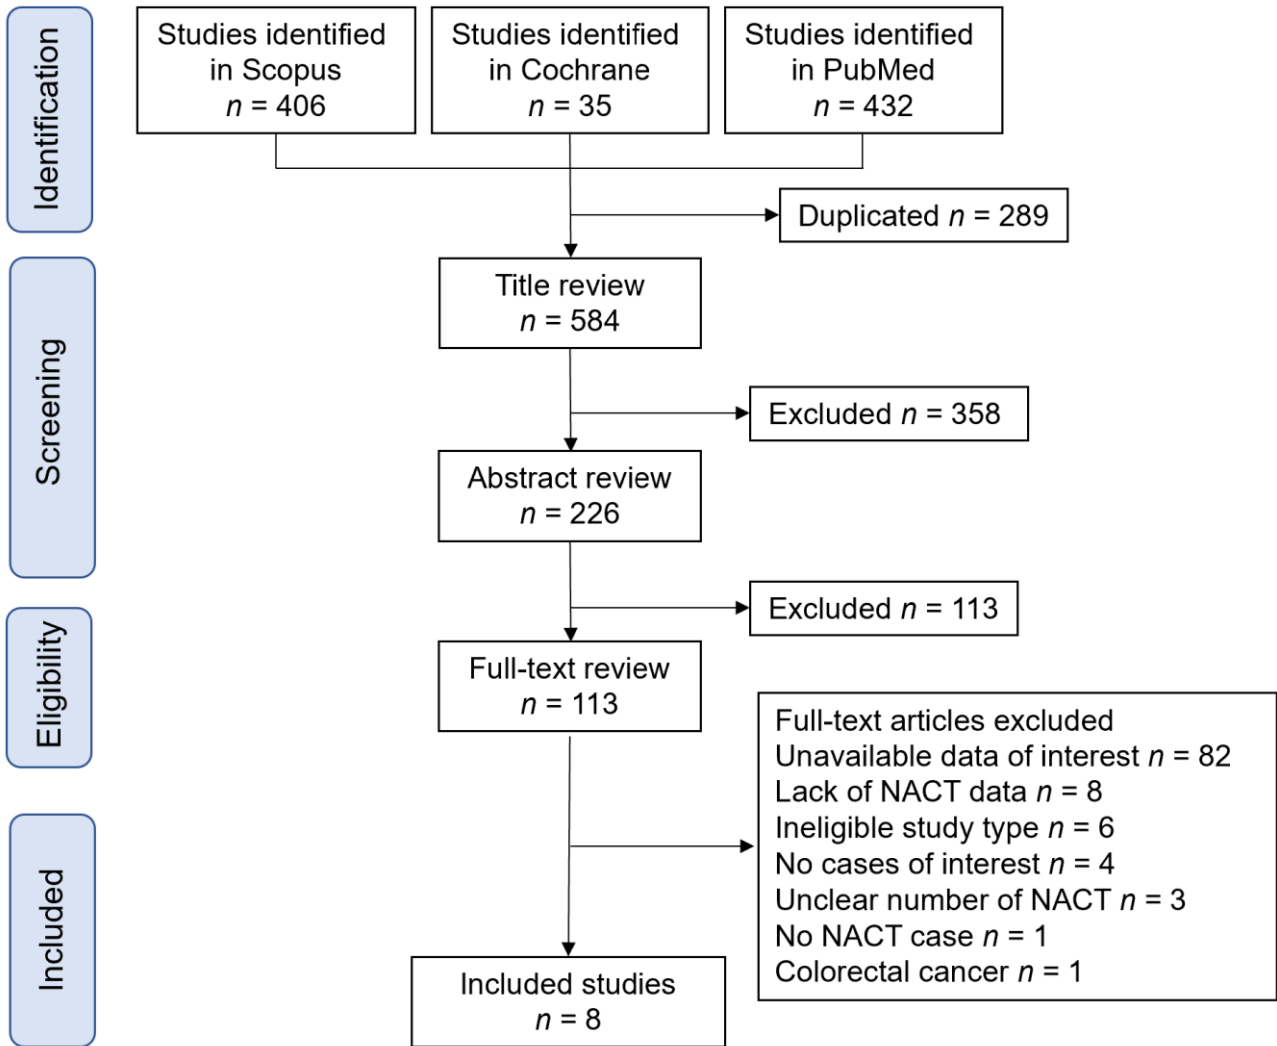

NACT, neoadjuvant chemotherapy.

**eFigure 6. Meta-analysis (exploratory).**

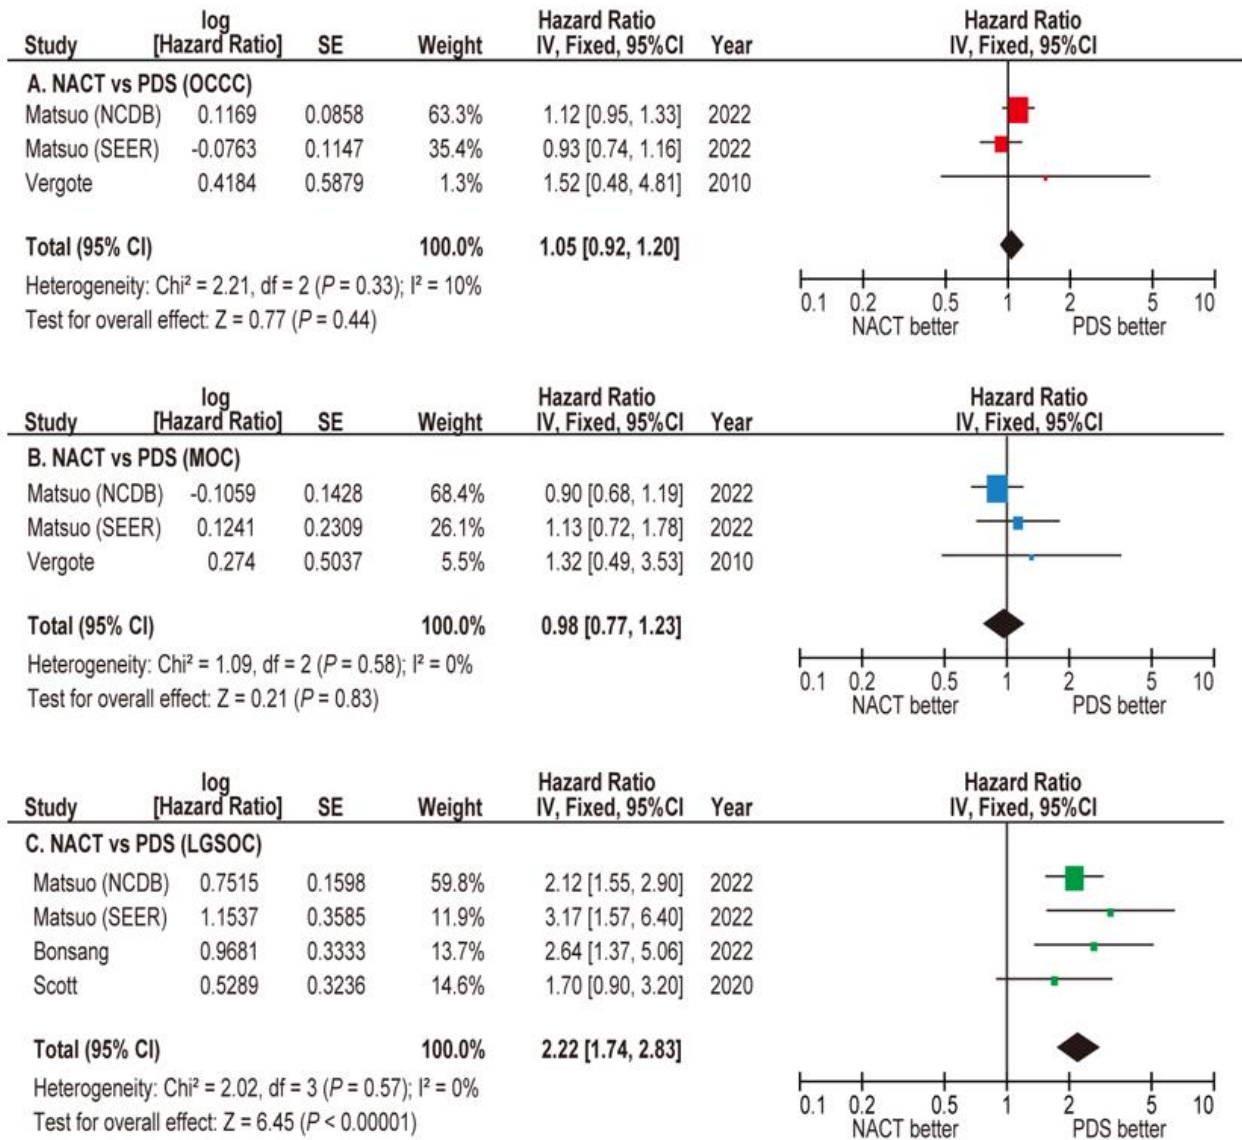

Both main cohort and second cohort of the current study were included. Pooled hazard ratios were calculated using RevMan version 5.4.1 (Cochrane Collaboration, Copenhagen, Denmark). Results of a meta-analysis for the effect of NACT on overall survival in patients with (A) clear cell, (B) mucinous, and (C) low-grade serous carcinomas are shown. A forest plot from a fixed effects meta-analysis of studies for overall survival are ordered within stratum by year of publication and relative weight (%) of studies. Heterogeneity was low among the studies in panel A ( $I^2=10\%$ ), and there was no heterogeneity among the studies in panels B and C ( $I^2=0\%$ ). NCDB, National Cancer Database; SEER, Surveillance Epidemiology and End Results Program; NACT, neoadjuvant chemotherapy; PDS, primary debulking surgery; OCCC, ovarian clear cell carcinoma; MOC, mucinous ovarian carcinoma; LGSOC, low-grade serous ovarian cancer; IV, inverse variable; CI, confidence interval.

**eFigure 7. Meta-analysis for stage III disease (exploratory).**

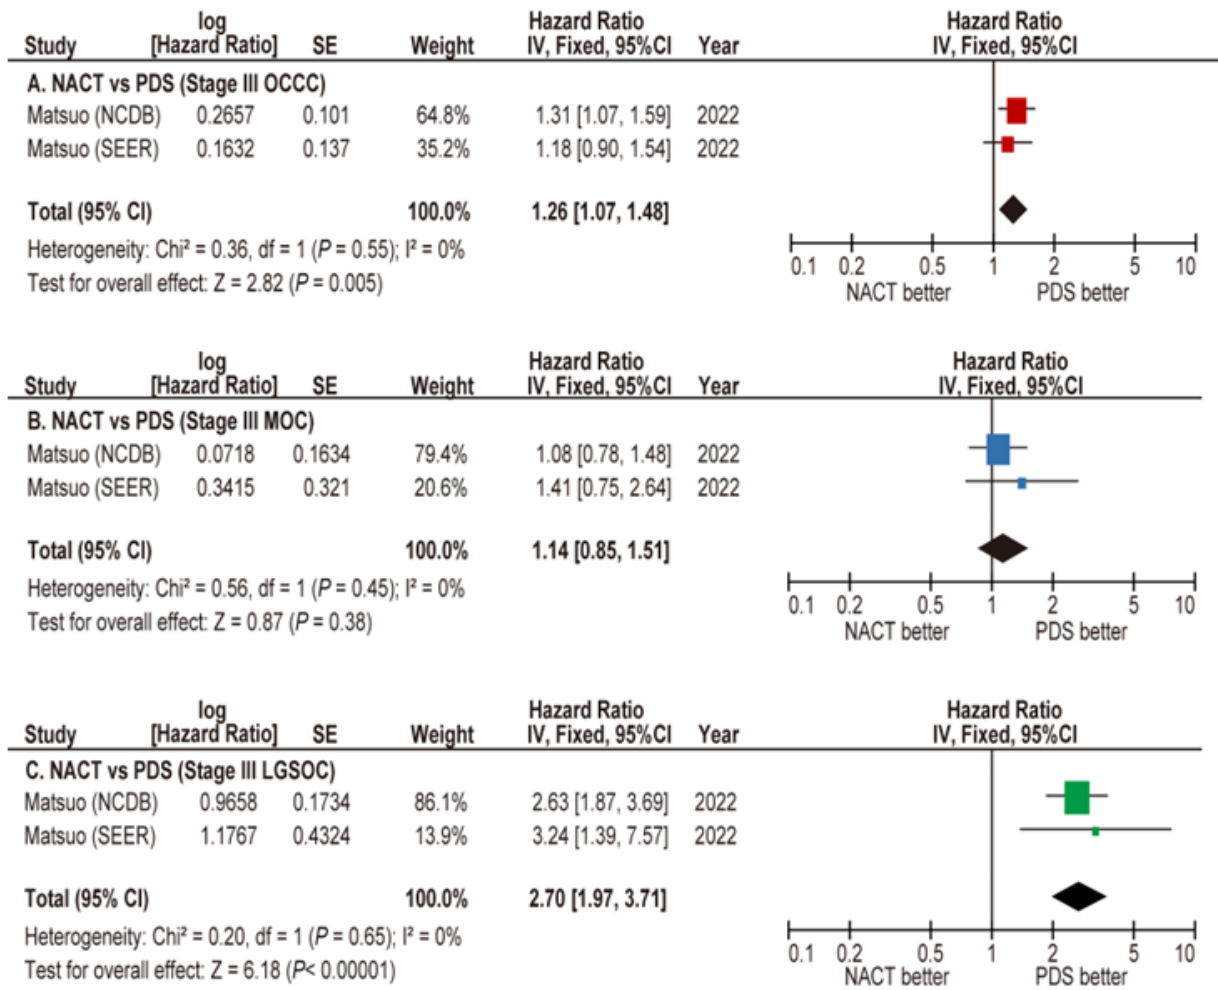

Both main cohort and second cohort of the current study were included. Results of stage III disease for (A) clear cell, (B) mucinous, and (C) low-grade serous carcinomas are shown. *NCDB*, National Cancer Database; *SEER*, Surveillance Epidemiology and End Results program; *NACT*, neoadjuvant chemotherapy; *PDS*, primary debulking surgery; *OCCC*, ovarian clear cell carcinoma; *MOC*, mucinous ovarian carcinoma; *LGSOC*, low-grade serous ovarian cancer; *IV*, inverse variable; *CI*, confidence interval.

**eFigure 8. Meta-analysis for stage IV disease (exploratory).**

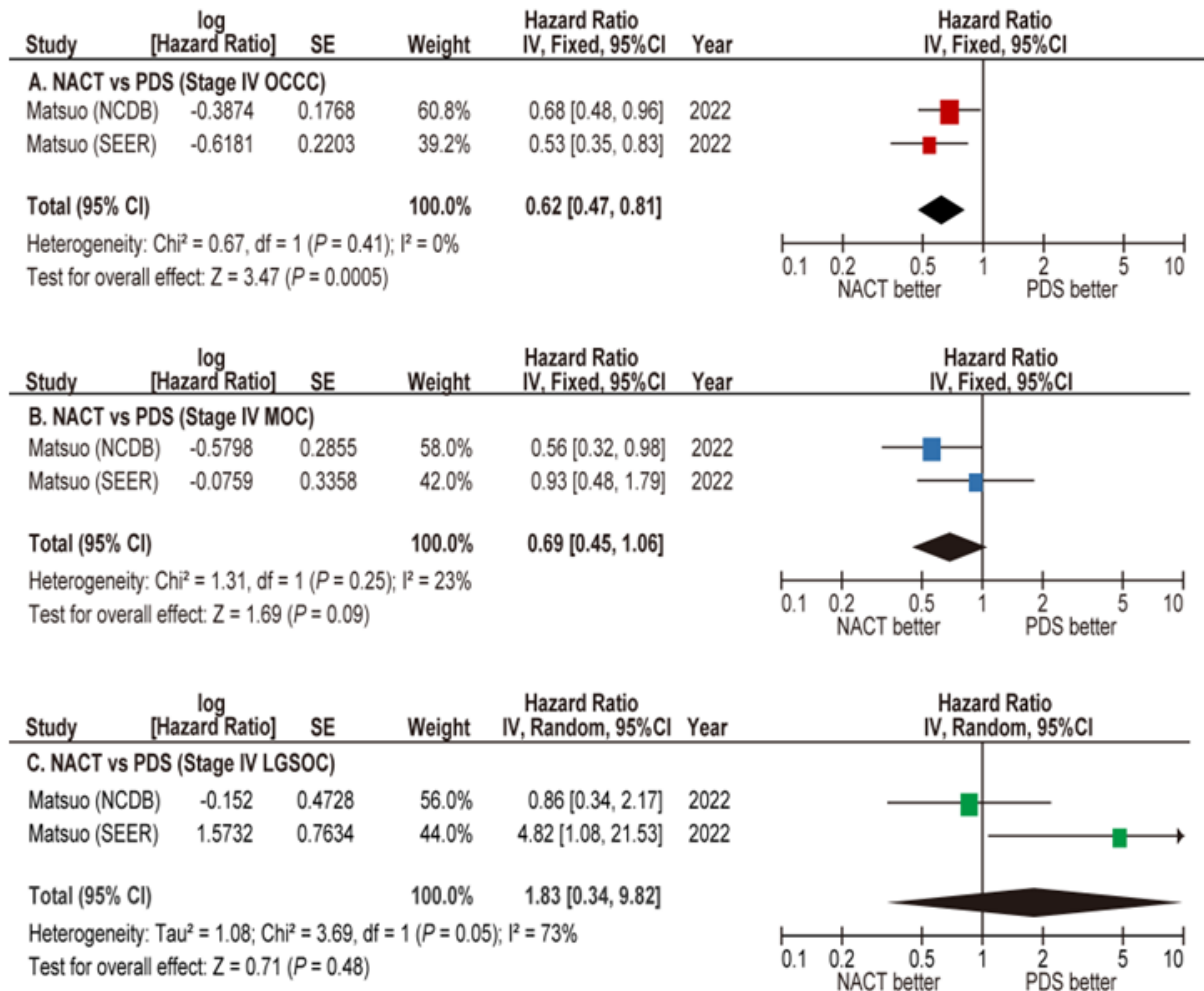

Both main cohort and second cohort of the current study were included. Results of stage IV disease for (A) clear cell, (B) mucinous, and (C) low-grade serous carcinomas are shown. *NCDB*, National Cancer Database; *SEER*, Surveillance Epidemiology and End Results program; *NACT*, neoadjuvant chemotherapy; *PDS*, primary debulking surgery; *OCCC*, ovarian clear cell carcinoma; *MOC*, mucinous ovarian carcinoma; *LGSOC*, low-grade serous ovarian cancer; *IV*, inverse variable; *CI*, confidence interval.
