# Supplementary material for: Uptake and Outcomes of Neoadjuvant Chemotherapy Among US Patients With Less Common Epithelial Ovarian Carcinomas
Source: PubMed Central journal article supplement (PMC10276312; doi:10.1001/jamanetworkopen.2023.18602), 2023-06-16
Supplement: jamanetwopen-e2318602-s002.pdf [file jamanetwopen-e2318602-s002.pdf]

## Data Sharing Statement

Matsuo. Uptake and Outcomes of Neoadjuvant Chemotherapy Among US Patients With Less Common Epithelial Ovarian Carcinomas. *JAMA Netw Open*. Published June 16, 2023.

doi:10.1001/jamanetworkopen.2023.18602

### Data

**Data available:** No

### Additional Information

**Explanation for why data not available:** Data Sharing: The data on which this study is based are publicly available upon request at the National Cancer Database

(<https://www.facs.org/quality-programs/cancer-programs/national-cancer-database/>) and the

National Cancer Institute's Surveillance, Epidemiology, and End Result Program

(<https://seer.cancer.gov/>).
